# Supplementary material for: Myopia and Near Work: A Systematic Review and Meta-Analysis
Source: MDPI journal article supplement (doi:10.3390/ijerph20010875), 2023-01-03

**Text S1.** Details of search strategy

**Pubmed**

("myopia"[All Fields] OR "short sight"[All Fields])

AND

("near-work"[All Fields] OR "display"[All Fields] OR "user"[All Fields])

**Embase**

('myopia'/exp OR myopia OR 'short sight')

AND

('near work' OR (near AND ('work'/exp OR work))) OR user OR display)

**Cochrane**

"myopia" OR "short-sight"

AND "near-work" OR "user"

**ScienceDirect**

("myopia" OR "short sight")

AND

("near-work" OR "display" OR "user")

### A. Risk of bias for each included article using the SIGN model

### A. Risk of bias for each included article using the SIGN model

[illegible]

## B. Risk of bias for each included article using the STROBE checklist

|                        | Total score | Abstract Introduction | Methods | Results | Discussion |
|------------------------|-------------|-----------------------|---------|---------|------------|
| Adams 1992             | 65          | 75                    | 50      | 70      | 100        |
| Alomair 2021           | 79,0        | 100                   | 80      | 57      | 100        |
| Alsailf 2019           | 88,7        | 100                   | 80      | 86      | 100        |
| Atowa 2020             | 74,0        | 75                    | 90      | 57      | 100        |
| Basso 2006             | 85,7        | 100                   | 100     | 57      | 100        |
| Belhane 2022           | 92,0        | 100                   | 90      | 86      | 100        |
| Bez 2019               | 85,7        | 100                   | 100     | 57      | 100        |
| Chiang 2020            | 87,0        | 75                    | 100     | 86      | 75         |
| Crepita 2010           | 46,3        | 75                    | 50      | 14      | 100        |
| Demir 2021             | 90,0        | 100                   | 70      | 100     | 75         |
| Deng 2010              | 90,0        | 100                   | 70      | 100     | 100        |
| Donovan 2012           | 62,7        | 75                    | 70      | 43      | 75         |
| Edwards 1999           | 66,3        | 100                   | 70      | 29      | 100        |
| Enthoven 2020          | 81,0        | 100                   | 100     | 43      | 100        |
| Enthoven 2021          | 95,3        | 100                   | 100     | 86      | 100        |
| Fernandez-Montoro 2015 | 83,3        | 100                   | 80      | 70      | 100        |
| French 2013            | 85,7        | 100                   | 100     | 57      | 100        |
| Giloyan 2017           | 85,7        | 100                   | 100     | 57      | 75         |
| Guo 2013               | 85,7        | 100                   | 100     | 57      | 100        |
| Guo 2016               | 85,7        | 100                   | 100     | 57      | 100        |
| Guo 2017               | 77,7        | 100                   | 90      | 43      | 100        |
| Han 2019               | 95,3        | 100                   | 100     | 86      | 100        |
| Hansen 2019            | 81,0        | 100                   | 100     | 43      | 100        |
| Hinterlong 2019        | 85,7        | 100                   | 100     | 57      | 100        |
| Holton 2019            | 82,3        | 100                   | 90      | 57      | 100        |
| Hu 2016                | 86,7        | 100                   | 60      | 100     | 100        |
| Hu 2017                | 81,0        | 100                   | 100     | 43      | 100        |
| Huang 2019             | 95,3        | 100                   | 100     | 86,0    | 100        |
| Huang 2020             | 85,7        | 100                   | 100     | 57      | 100        |
| Hung 2020              | 81,0        | 100                   | 100     | 43      | 100        |
| Ip 2008                | 85,7        | 100                   | 100     | 57      | 100        |
| Jacobsen 2008          | 82,3        | 100                   | 90      | 57      | 100        |
| Jones 2017             | 85,7        | 100                   | 100     | 57      | 100        |
| Jones-Jordan 2011      | 46,3        | 75                    | 50      | 14      | 100        |
| Jones-Jordan 2012      | 51,3        | 100                   | 40      | 14      | 100        |
| Khader 2006            | 81,0        | 100                   | 100     | 43      | 100        |
| Kim 2020               | 83,3        | 100                   | 80      | 70      | 100        |
| Kinge 2000             | 72,7        | 75                    | 100     | 43      | 100        |
| Konstantopoulos 2008   | 54,7        | 100                   | 50      | 14      | 100        |
| Ku 2019                | 88,7        | 100                   | 80      | 86      | 100        |
| Lam 1999               | 74,3        | 100                   | 80      | 43      | 100        |
| Lanca 2021             | 88,7        | 100                   | 80      | 86      | 100        |
| Lee 2013               | 83,3        | 100                   | 80      | 70      | 100        |
| Lee 2017               | 93,3        | 100                   | 80      | 100     | 100        |
| Li 2015                | 77,3        | 75                    | 100     | 57      | 100        |
| Lin 2014               | 77,3        | 75                    | 100     | 57      | 100        |
| Lin 2016               | 74,3        | 100                   | 80      | 43      | 100        |
| Lin 2017               | 74,3        | 100                   | 80      | 43      | 100        |
| Liu 2021               | 77,7        | 100                   | 90      | 43      | 100        |
| Loman 2002             | 69,3        | 100                   | 80      | 28      | 100        |
| Lu 2009                | 83,7        | 75                    | 90      | 86      | 100        |
| Ma et al 2018          | 96,7        | 100                   | 90      | 100     | 100        |
| Mavrikanas 2000        | 67,7        | 75                    | 100     | 28      | 75         |
| McBrien 1997           | 66,0        | 75                    | 80      | 43      | 100        |
| McCann 2021            | 81,7        | 75                    | 100     | 70      | 100        |
| Muhammedagic 2014      | 90,0        | 100                   | 100     | 70      | 100        |
| Mutt2002               | 77,7        | 100                   | 90      | 43      | 100        |
| Oral 2007              | 71,0        | 100                   | 70      | 43      | 100        |
| Pässiinen 2014         | 90,0        | 100                   | 70      | 100     | 100        |
| Pässiinen 2021         | 81,0        | 100                   | 100     | 43      | 100        |
| Patel2019              | 80,0        | 100                   | 70      | 70      | 100        |
| Qi 2019                | 83,3        | 100                   | 80      | 70      | 100        |
| Roscz2008              | 90,0        | 100                   | 80      | 90      | 100        |
| Saw1999                | 76,0        | 100                   | 100     | 28      | 100        |
| Saw2001                | 100,0       | 100                   | 100     | 100     | 100        |
| Saw 2002               | 81,0        | 100                   | 100     | 43      | 100        |
| Speeg-Schatz 2001      | 64,3        | 100                   | 50      | 43      | 100        |
| Sun 2018               | 85,7        | 100                   | 100     | 57      | 100        |
| Wong 1993              | 61,0        | 100                   | 40      | 43      | 75         |
| Woodman 2011           | 81,0        | 100                   | 100     | 43      | 100        |
| Wu 2010                | 82,3        | 100                   | 90      | 57      | 75         |
| Wu 2015                | 88,7        | 100                   | 80      | 86      | 100        |
| Yang 2017              | 71,0        | 100                   | 70      | 43      | 100        |
| Yao 2019               | 90,0        | 100                   | 70      | 100     | 100        |
| Yotsukura 2021         | 65,7        | 100                   | 40      | 57      | 100        |
| You 2016               | 81,0        | 100                   | 100     | 43      | 75         |
| Zadnik 2015            | 82,3        | 100                   | 90      | 57      | 75         |
| Zhong 2016             | 74,3        | 100                   | 80      | 43      | 100        |

**Figure S3.** Metaregressions on factors influencing the myopia progression per year

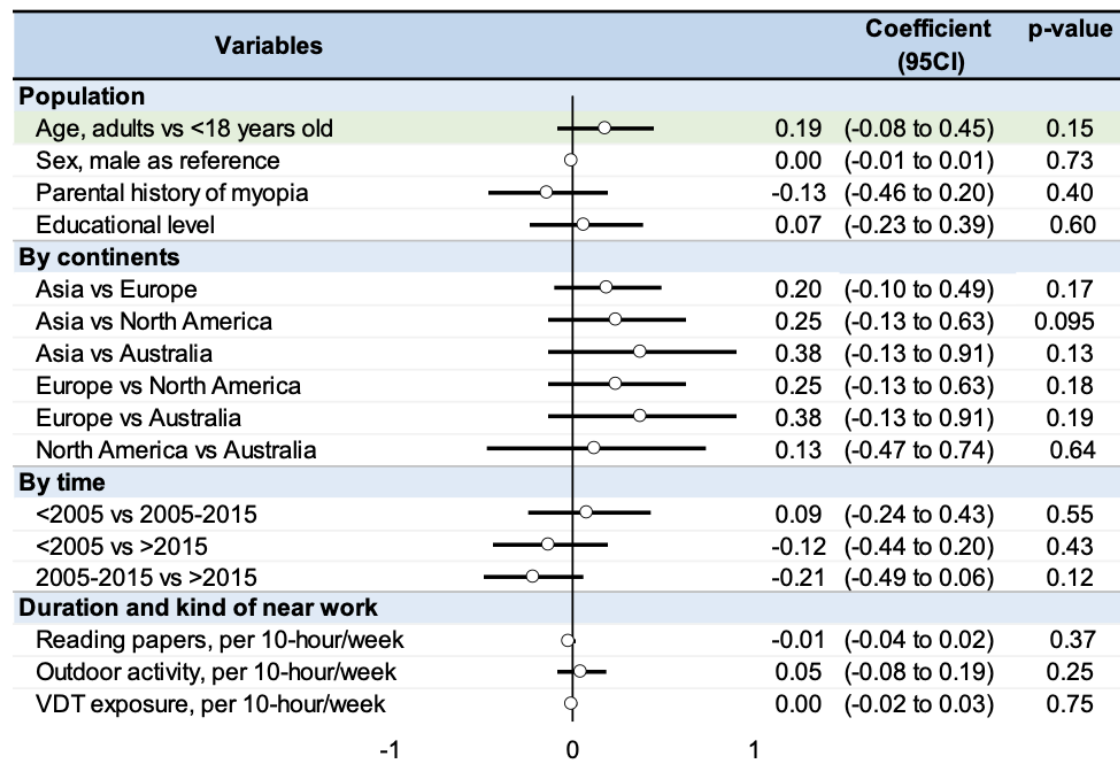

**Figure S4.** Metaregressions on factors influencing the odds ratio for myopia

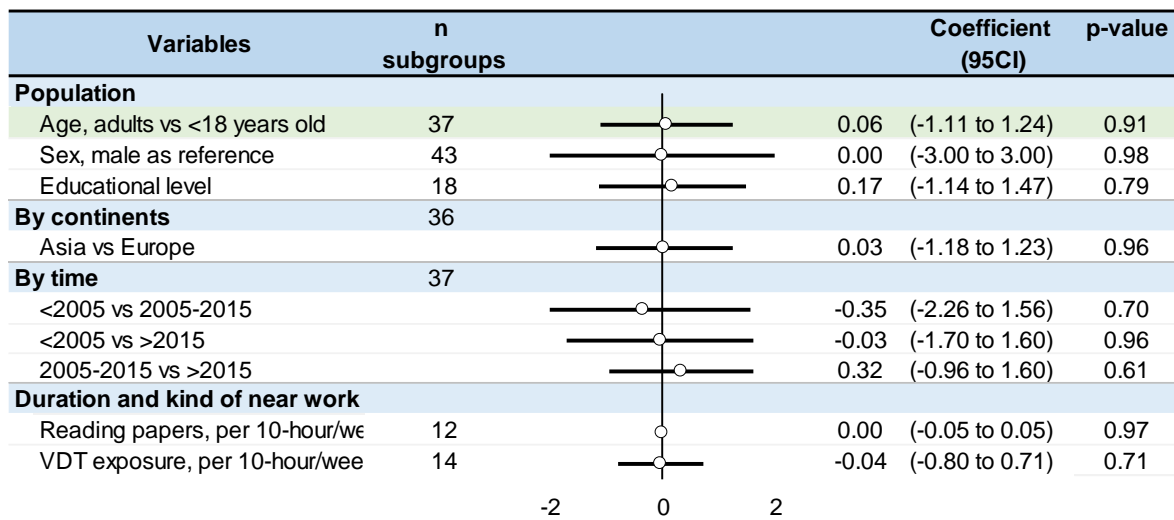

Supplement: s1 [file s1]
